# Supplementary material for: Species identification and molecular typing of human Brucella isolates from Kuwait
Source: PubMed Central journal article supplement (PMC5553756; doi:10.1371/journal.pone.0182111), 2017-08-11
Supplement: pone.0182111.s006.pdf [file pone.0182111.s006.pdf]

Assay Class: DNA 1000  
 Data Path: C:\...-16\2100 expert\_DNA 1000\_DE72901399\_2015-11-16\_09-53-21.xad

Created: 11/16/2015 9:53:20 AM  
 Modified: 2/2/2016 8:53:35 AM

**Electrophoresis File Run Summary**

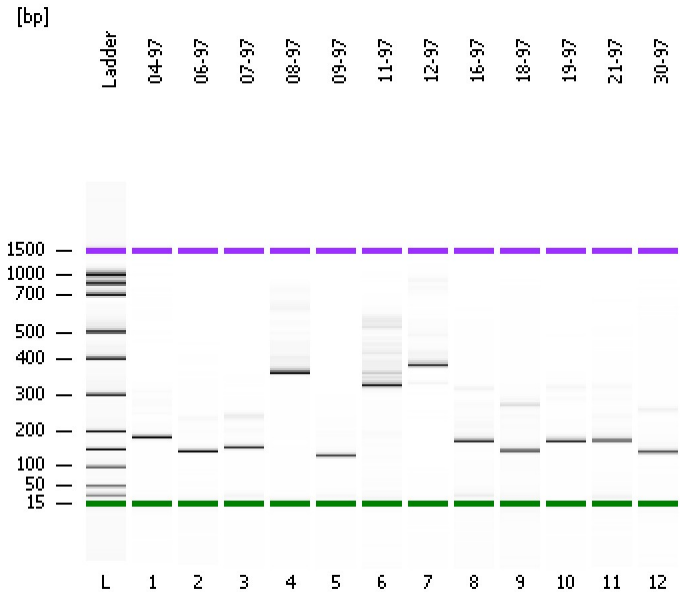

Instrument Information:

Instrument Name: DE72901399      Firmware: C.01.069  
 Serial#: DE72901399      Type: G2939A

Assay Information:

Assay Origin Path: C:\Program Files\Agilent\2100 bioanalyzer\2100 expert\assays\dsDNA\DNA 1000 Series II.xsy

Assay Class: DNA 1000  
 Version: 2.3  
 Assay Comments: DNA Analysis 25 -1000 bp

© Copyright 2003-2009 Agilent Technologies, Inc.

Chip Information:

Chip Lot #:   
 Reagent Kit Lot #:   
 Chip Comments:

04-97

06-97

07-97

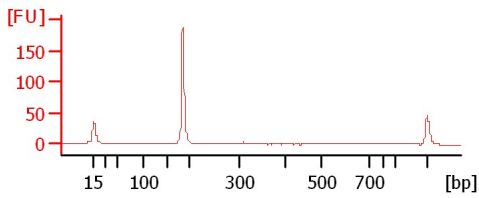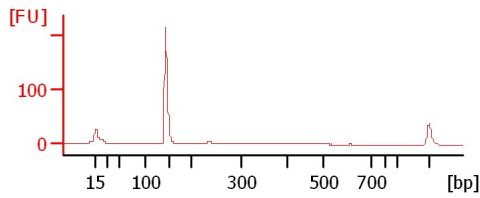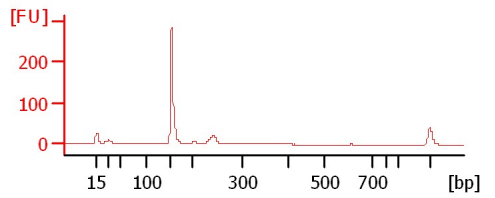

08-97

09-97

11-97

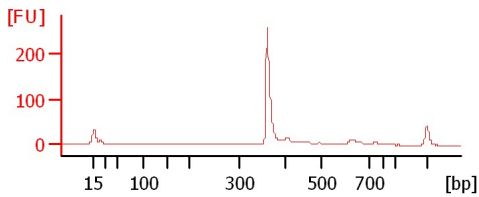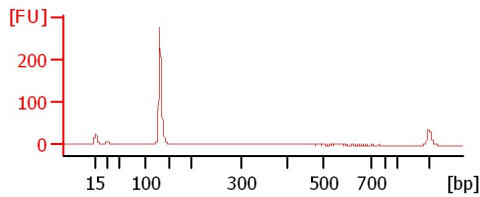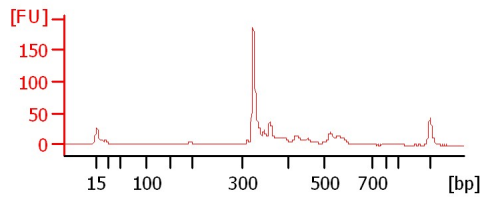

12-97

16-97

18-97

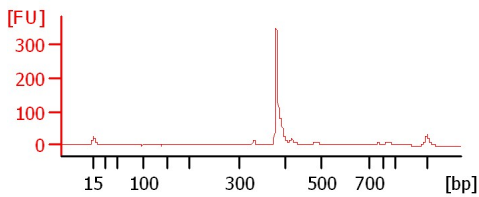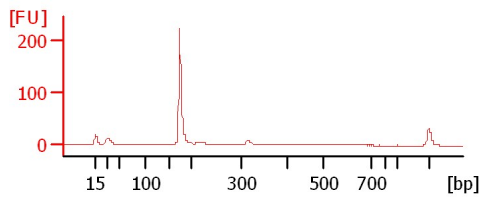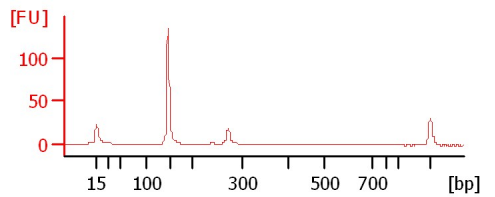

19-97

21-97

30-97

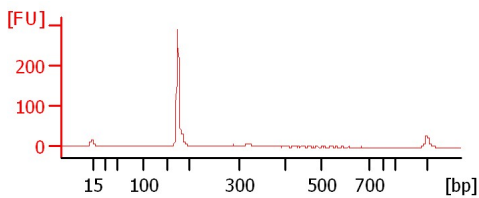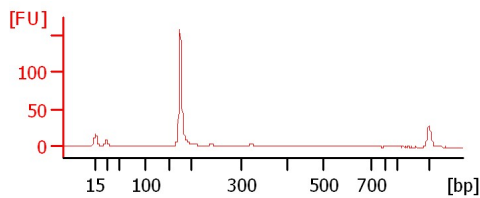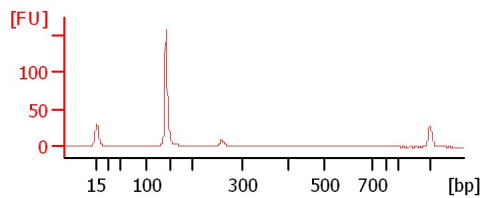

Assay Class: DNA 1000  
 Data Path: C:\...-16\2100 expert\_DNA 1000\_DE72901399\_2015-11-16\_09-53-21.xad

Created: 11/16/2015 9:53:20 AM  
 Modified: 2/2/2016 8:53:35 AM

**Electrophoresis File Run Summary (Chip Summary)**

| Sample Name | Sample Comment | Rest. Digest             | Status Observations | Result Label | Result Color |
|-------------|----------------|--------------------------|---------------------|--------------|--------------|
| 04-97       |                | <input type="checkbox"/> | ✓                   |              |              |
| 06-97       |                | <input type="checkbox"/> | ✓                   |              |              |
| 07-97       |                | <input type="checkbox"/> | ✓                   |              |              |
| 08-97       |                | <input type="checkbox"/> | ✓                   |              |              |
| 09-97       |                | <input type="checkbox"/> | ✓                   |              |              |
| 11-97       |                | <input type="checkbox"/> | ✓                   |              |              |
| 12-97       |                | <input type="checkbox"/> | ✓                   |              |              |
| 16-97       |                | <input type="checkbox"/> | ✓                   |              |              |
| 18-97       |                | <input type="checkbox"/> | ✓                   |              |              |
| 19-97       |                | <input type="checkbox"/> | ✓                   |              |              |
| 21-97       |                | <input type="checkbox"/> | ✓                   |              |              |
| 30-97       |                | <input type="checkbox"/> | ✓                   |              |              |
| Ladder      |                | <input type="checkbox"/> | ✓                   |              |              |

Chip Lot #

Reagent Kit Lot #

Chip Comments :

Assay Class: DNA 1000  
Data Path: C:\...-16\2100 expert\_DNA 1000\_DE72901399\_2015-11-16\_09-53-21.xad

Created: 11/16/2015 9:53:20 AM  
Modified: 2/2/2016 8:53:35 AM

## Electrophoresis Assay Details

### General Analysis Settings

Number of Available Sample and Ladder Wells (Max.) : 13  
Minimum Visible Range [s] : 30  
Maximum Visible Range [s] : 129  
Start Analysis Time Range [s] : 30  
End Analysis Time Range [s] : 128.95  
Ladder Concentration [ng/μl] : 44  
Uses Standard Area for Ladder Fragments  
Lower Marker Concentration [ng/μl] : 4.2  
Upper Marker Concentration [ng/μl] : 2.1  
Used Upper Marker for Quantitation  
Standard Curve Fit is Point to Point  
Show Data Aligned to Lower and Upper Marker

### Integrator Settings

Integration Start Time [s] : 30  
Integration End Time [s] : 128.95  
Slope Threshold : 0.5  
Height Threshold [FU] : 20  
Area Threshold : 0.1  
Width Threshold [s] : 0.5  
Baseline Plateau [s] : 0.5

### Filter Settings

Filter Width [s] : 0.5  
Polynomial Order : 4

### Ladder

| Ladder Peak | Size | Area |
|-------------|------|------|
| 1           | 15   | 25   |
| 2           | 25   | 26   |
| 3           | 50   | 34   |
| 4           | 100  | 41   |
| 5           | 150  | 45   |
| 6           | 200  | 52   |
| 7           | 300  | 63   |
| 8           | 400  | 76   |
| 9           | 500  | 83   |
| 10          | 700  | 88   |
| 11          | 850  | 86   |
| 12          | 1000 | 90   |
| 13          | 1500 | 52   |

Assay Class: DNA 1000  
 Data Path: C:\...-16\2100 expert\_DNA 1000\_DE72901399\_2015-11-16\_09-53-21.xad

Created: 11/16/2015 9:53:20 AM  
 Modified: 2/2/2016 8:53:35 AM

**Electropherogram Summary**

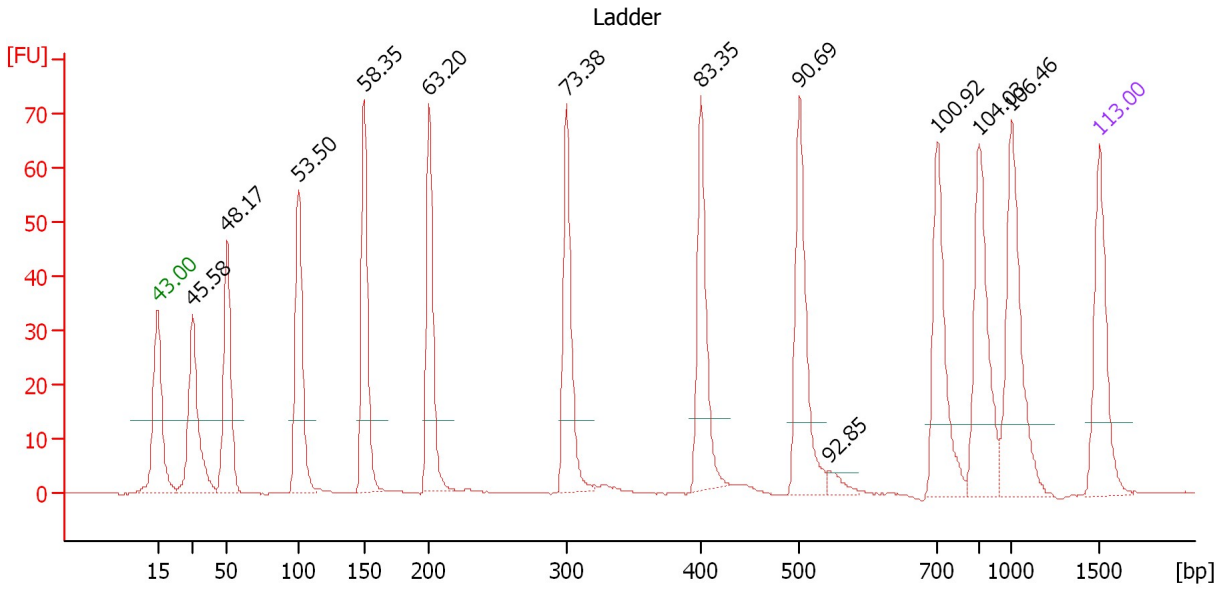

**Peak table for Ladder**

| Peak | Size [bp] | Conc. [ng/μl] | Molarity [nmol/l] | Observations |
|------|-----------|---------------|-------------------|--------------|
| 1    | 15        | 4.20          | 424.2             | Lower Marker |
| 2    | 25        | 4.00          | 242.4             | Ladder Peak  |
| 3    | 50        | 4.00          | 121.2             | Ladder Peak  |
| 4    | 100       | 4.00          | 60.6              | Ladder Peak  |
| 5    | 150       | 4.00          | 40.4              | Ladder Peak  |
| 6    | 200       | 4.00          | 30.3              | Ladder Peak  |
| 7    | 300       | 4.00          | 20.2              | Ladder Peak  |
| 8    | 400       | 4.00          | 15.2              | Ladder Peak  |
| 9    | 500       | 4.00          | 12.1              | Ladder Peak  |
| 10   | 542       | 0.00          | 0.0               |              |
| 11   | 700       | 4.00          | 8.7               | Ladder Peak  |
| 12   | 850       | 4.00          | 7.1               | Ladder Peak  |
| 13   | 1,000     | 4.00          | 6.1               | Ladder Peak  |
| 14   | 1,500     | 2.10          | 2.1               | Upper Marker |

Assay Class: DNA 1000  
 Data Path: C:\...-16\2100 expert\_DNA 1000\_DE72901399\_2015-11-16\_09-53-21.xad

Created: 11/16/2015 9:53:20 AM  
 Modified: 2/2/2016 8:53:35 AM

**Electropherogram Summary Continued ...**

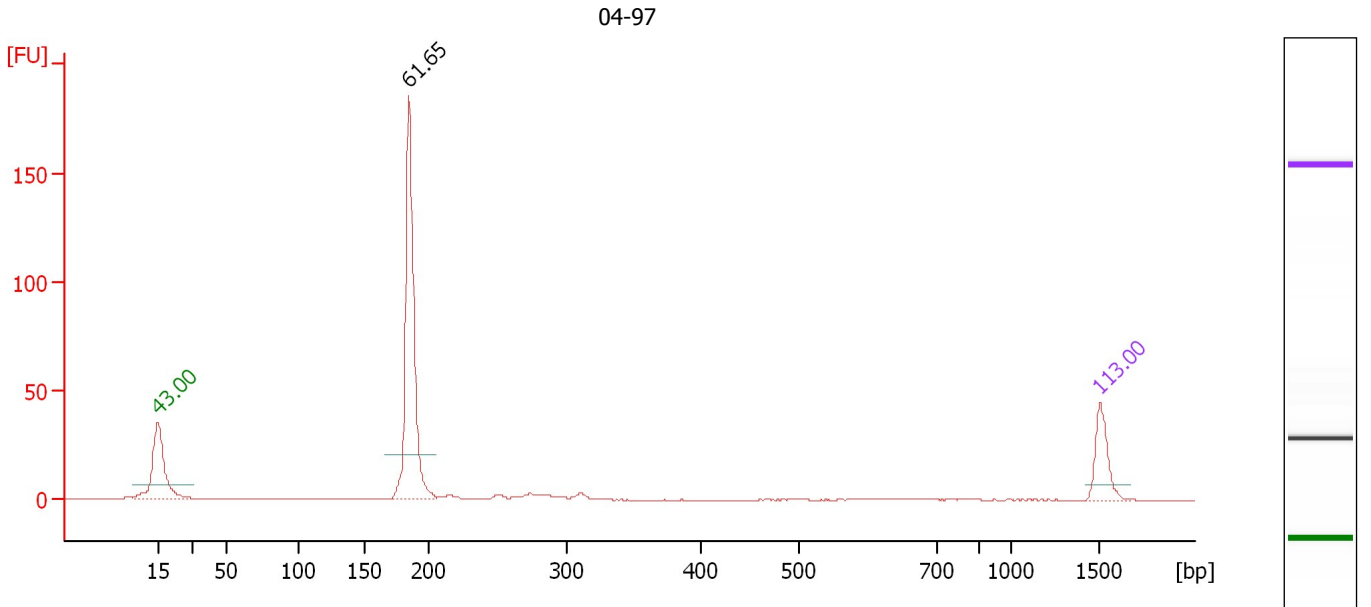

**Overall Results for sample 1 : 04-97**

Number of peaks found: 1

**Peak table for sample 1 : 04-97**

| Peak | Size [bp] | Conc. [ng/μl] | Molarity [nmol/l] | Observations |
|------|-----------|---------------|-------------------|--------------|
| 1    | 15        | 4.20          | 424.2             | Lower Marker |
| 2    | 184       | 11.71         | 96.4              |              |
| 3    | 1,500     | 2.10          | 2.1               | Upper Marker |

Assay Class: DNA 1000  
 Data Path: C:\...-16\2100 expert\_DNA 1000\_DE72901399\_2015-11-16\_09-53-21.xad

Created: 11/16/2015 9:53:20 AM  
 Modified: 2/2/2016 8:53:35 AM

**Electropherogram Summary Continued ...**

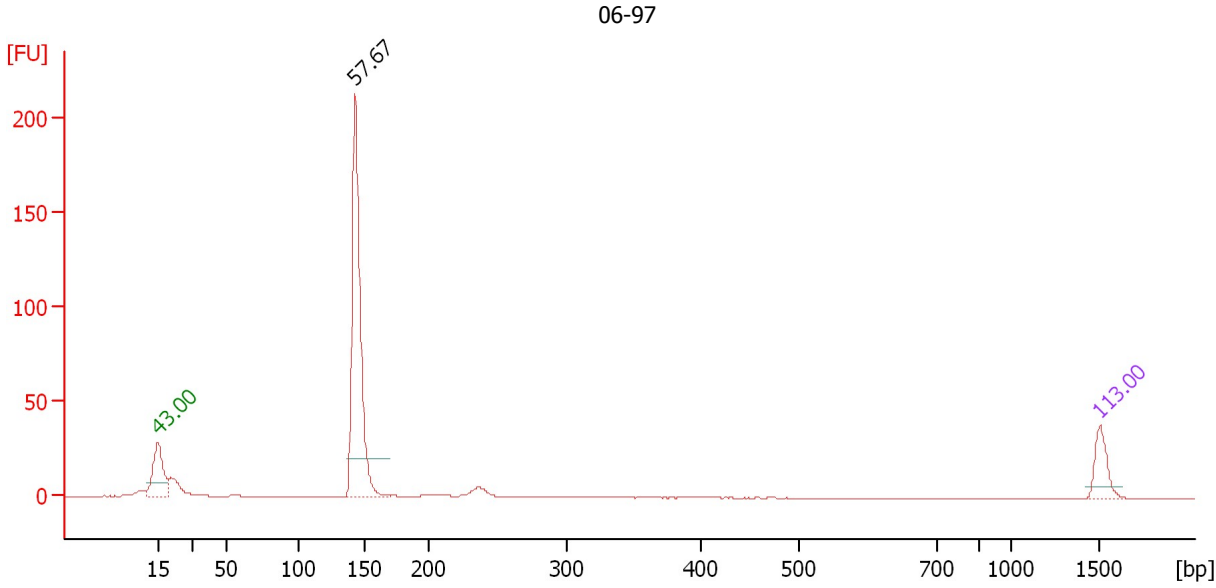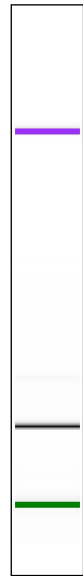

**Overall Results for sample 2 : 06-97**

Number of peaks found: 1

**Peak table for sample 2 : 06-97**

| Peak | Size [bp] | Conc. [ng/μl] | Molarity [nmol/l] | Observations |
|------|-----------|---------------|-------------------|--------------|
| 1    | 15        | 4.20          | 424.2             | Lower Marker |
| 2    | 143       | 17.37         | 184.0             |              |
| 3    | 1,500     | 2.10          | 2.1               | Upper Marker |

Assay Class: DNA 1000  
 Data Path: C:\...-16\2100 expert\_DNA 1000\_DE72901399\_2015-11-16\_09-53-21.xad

Created: 11/16/2015 9:53:20 AM  
 Modified: 2/2/2016 8:53:35 AM

**Electropherogram Summary Continued ...**

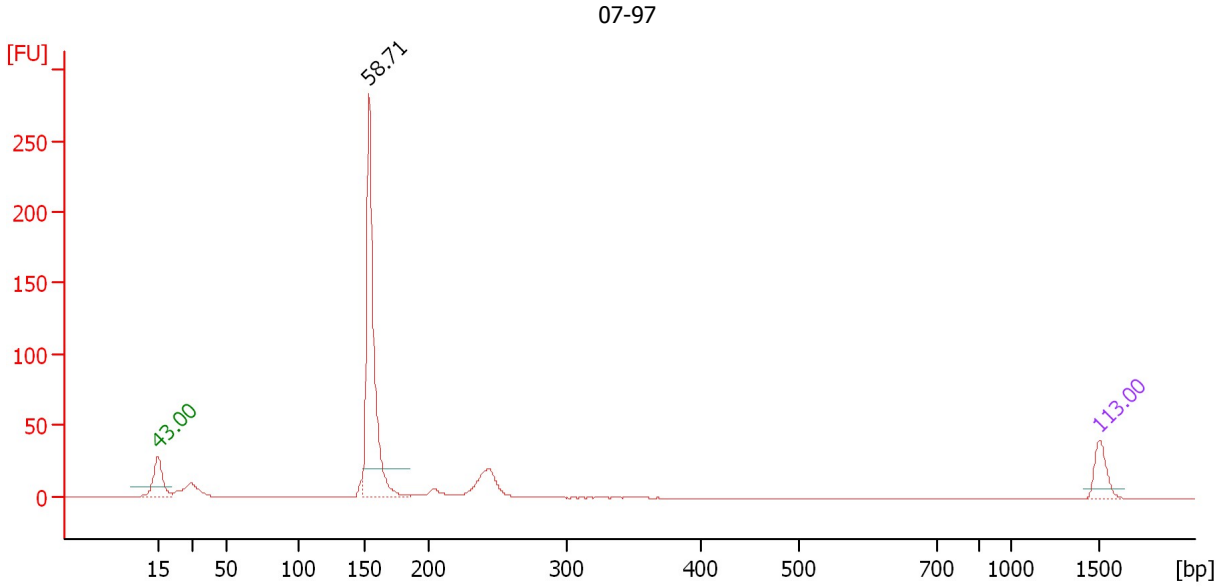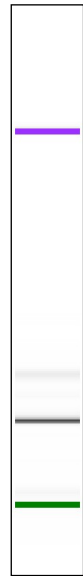

**Overall Results for sample 3 : 07-97**

Number of peaks found: 1

**Peak table for sample 3 : 07-97**

| Peak | Size [bp] | Conc. [ng/μl] | Molarity [nmol/l] | Observations |
|------|-----------|---------------|-------------------|--------------|
| 1    | 15        | 4.20          | 424.2             | Lower Marker |
| 2    | 154       | 18.84         | 185.6             |              |
| 3    | 1,500     | 2.10          | 2.1               | Upper Marker |

Assay Class: DNA 1000  
 Data Path: C:\...-16\2100 expert\_DNA 1000\_DE72901399\_2015-11-16\_09-53-21.xad

Created: 11/16/2015 9:53:20 AM  
 Modified: 2/2/2016 8:53:35 AM

**Electropherogram Summary Continued ...**

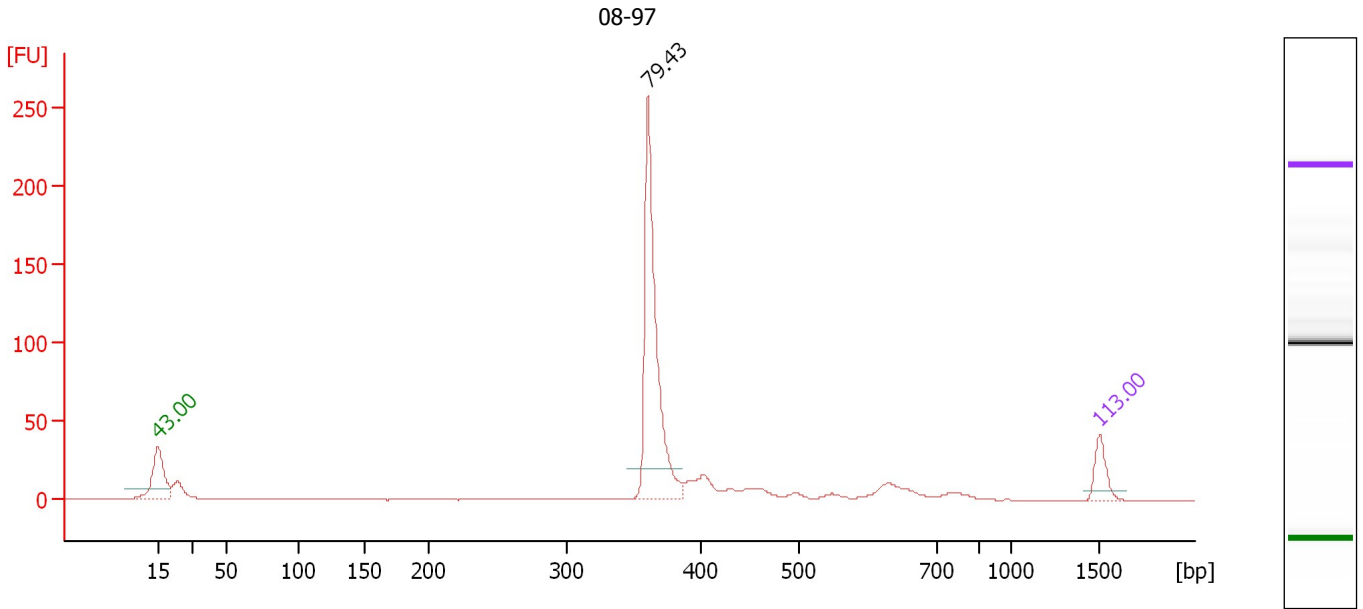

**Overall Results for sample 4 : 08-97**

Number of peaks found: 1

**Peak table for sample 4 : 08-97**

| Peak | Size [bp] | Conc. [ng/μl] | Molarity [nmol/l] | Observations |
|------|-----------|---------------|-------------------|--------------|
| 1    | 15        | 4.20          | 424.2             | Lower Marker |
| 2    | 361       | 17.68         | 74.3              |              |
| 3    | 1,500     | 2.10          | 2.1               | Upper Marker |



Assay Class: DNA 1000  
 Data Path: C:\...-16\2100 expert\_DNA 1000\_DE72901399\_2015-11-16\_09-53-21.xad

Created: 11/16/2015 9:53:20 AM  
 Modified: 2/2/2016 8:53:35 AM

**Electropherogram Summary Continued ...**

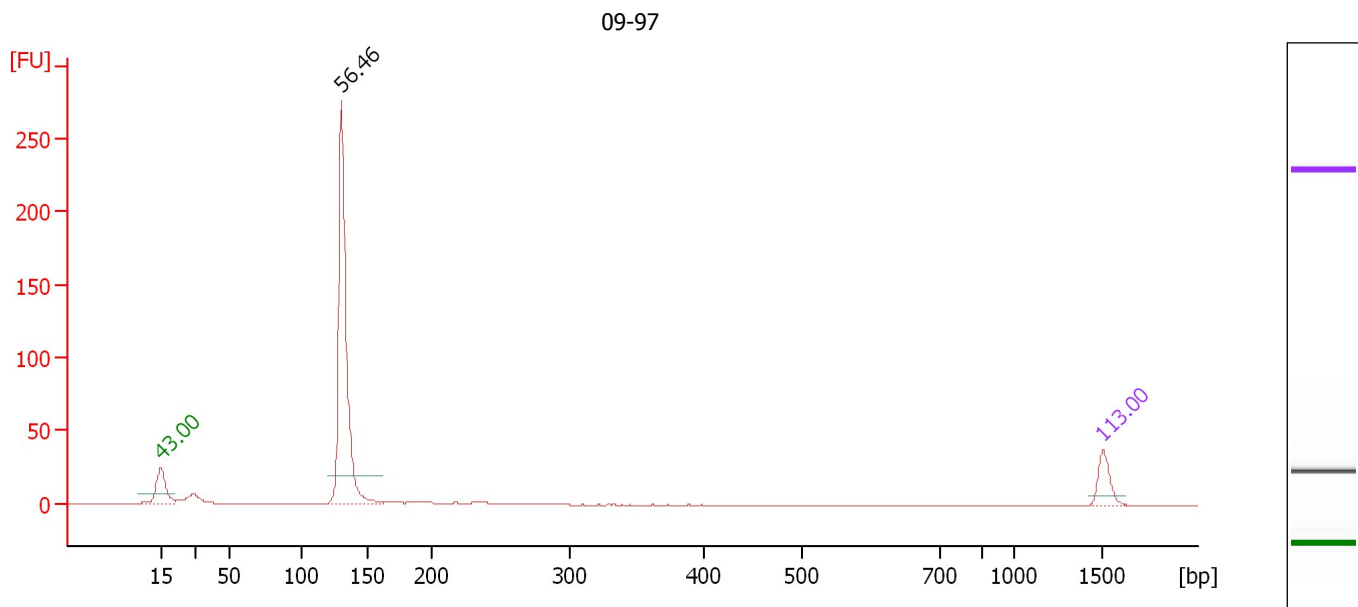

**Overall Results for sample 5 : 09-97**

Number of peaks found: 1

**Peak table for sample 5 : 09-97**

| Peak | Size [bp] | Conc. [ng/μl] | Molarity [nmol/l] | Observations |
|------|-----------|---------------|-------------------|--------------|
| 1    | 15        | 4.20          | 424.2             | Lower Marker |
| 2    | 131       | 22.35         | 259.4             |              |
| 3    | 1,500     | 2.10          | 2.1               | Upper Marker |

Assay Class: DNA 1000  
 Data Path: C:\...-16\2100 expert\_DNA 1000\_DE72901399\_2015-11-16\_09-53-21.xad

Created: 11/16/2015 9:53:20 AM  
 Modified: 2/2/2016 8:53:35 AM

**Electropherogram Summary Continued ...**

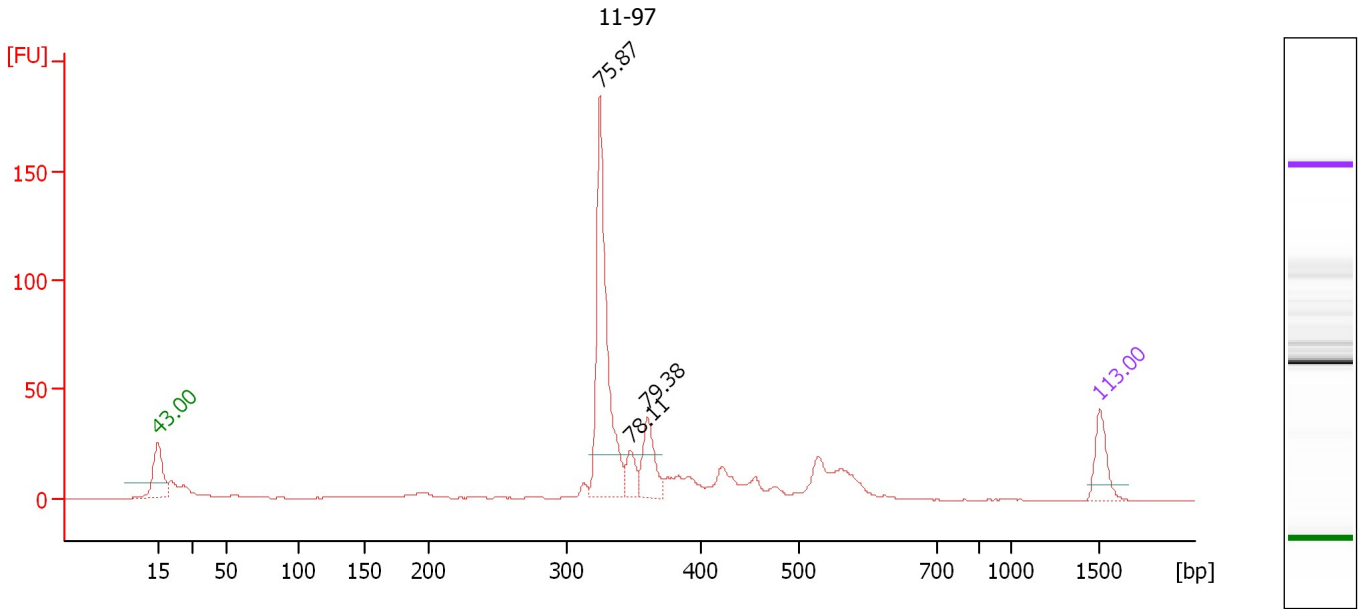

**Overall Results for sample 6 : 11-97**

Number of peaks found: 3

**Peak table for sample 6 : 11-97**

| Peak | Size [bp] | Conc. [ng/μl] | Molarity [nmol/l] | Observations |
|------|-----------|---------------|-------------------|--------------|
| 1    | 15        | 4.20          | 424.2             | Lower Marker |
| 2    | 325       | 12.39         | 57.8              |              |
| 3    | 347       | 1.33          | 5.8               |              |
| 4    | 360       | 2.74          | 11.5              |              |
| 5    | 1,500     | 2.10          | 2.1               | Upper Marker |

Assay Class: DNA 1000  
 Data Path: C:\...-16\2100 expert\_DNA 1000\_DE72901399\_2015-11-16\_09-53-21.xad

Created: 11/16/2015 9:53:20 AM  
 Modified: 2/2/2016 8:53:35 AM

**Electropherogram Summary Continued ...**

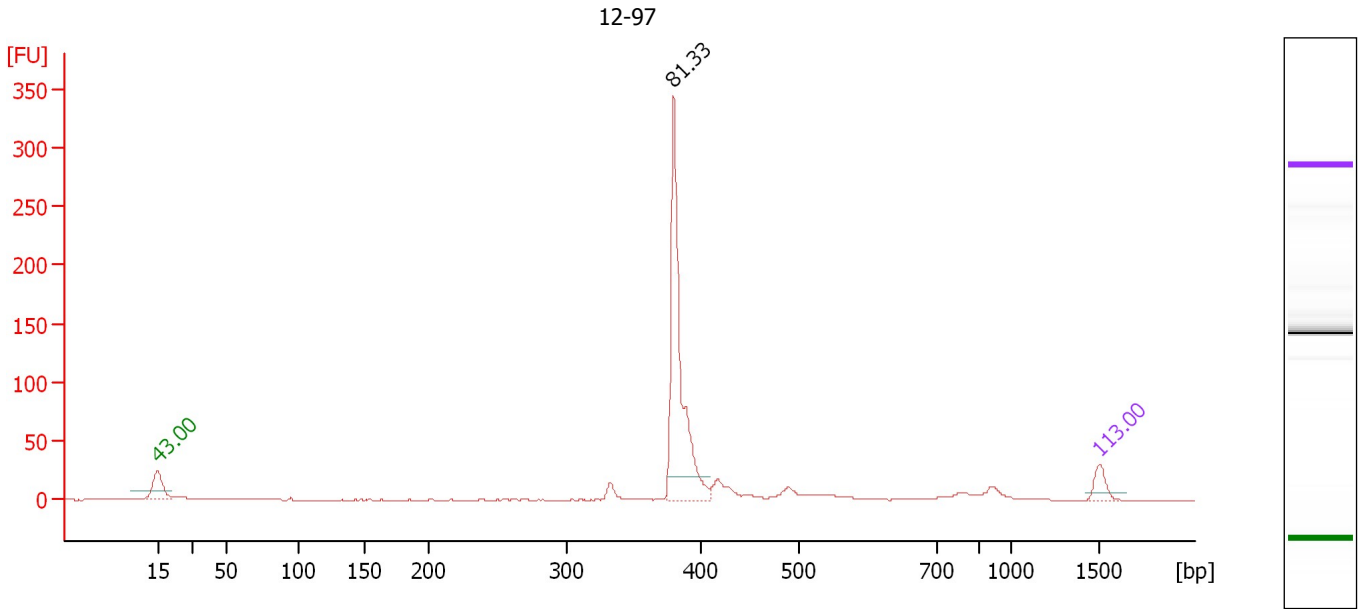

**Overall Results for sample 7 : 12-97**

Number of peaks found: 1

**Peak table for sample 7 : 12-97**

| Peak | Size [bp] | Conc. [ng/μl] | Molarity [nmol/l] | Observations |
|------|-----------|---------------|-------------------|--------------|
| 1    | 15        | 4.20          | 424.2             | Lower Marker |
| 2    | 380       | 26.78         | 106.9             |              |
| 3    | 1,500     | 2.10          | 2.1               | Upper Marker |

Assay Class: DNA 1000  
 Data Path: C:\...-16\2100 expert\_DNA 1000\_DE72901399\_2015-11-16\_09-53-21.xad

Created: 11/16/2015 9:53:20 AM  
 Modified: 2/2/2016 8:53:35 AM

**Electropherogram Summary Continued ...**

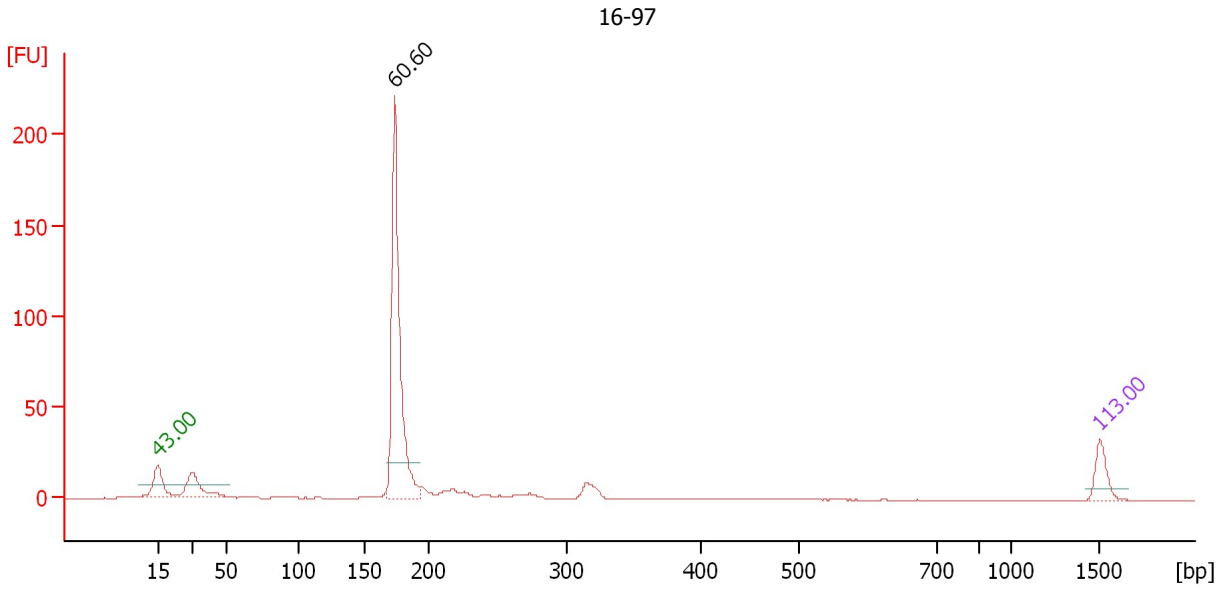

**Overall Results for sample 8 : 16-97**

Number of peaks found: 1

**Peak table for sample 8 : 16-97**

| Peak | Size [bp] | Conc. [ng/μl] | Molarity [nmol/l] | Observations |
|------|-----------|---------------|-------------------|--------------|
| 1    | 15        | 4.20          | 424.2             | Lower Marker |
| 2    | 173       | 19.57         | 171.3             |              |
| 3    | 1,500     | 2.10          | 2.1               | Upper Marker |

Assay Class: DNA 1000  
 Data Path: C:\...-16\2100 expert\_DNA 1000\_DE72901399\_2015-11-16\_09-53-21.xad

Created: 11/16/2015 9:53:20 AM  
 Modified: 2/2/2016 8:53:35 AM

**Electropherogram Summary Continued ...**

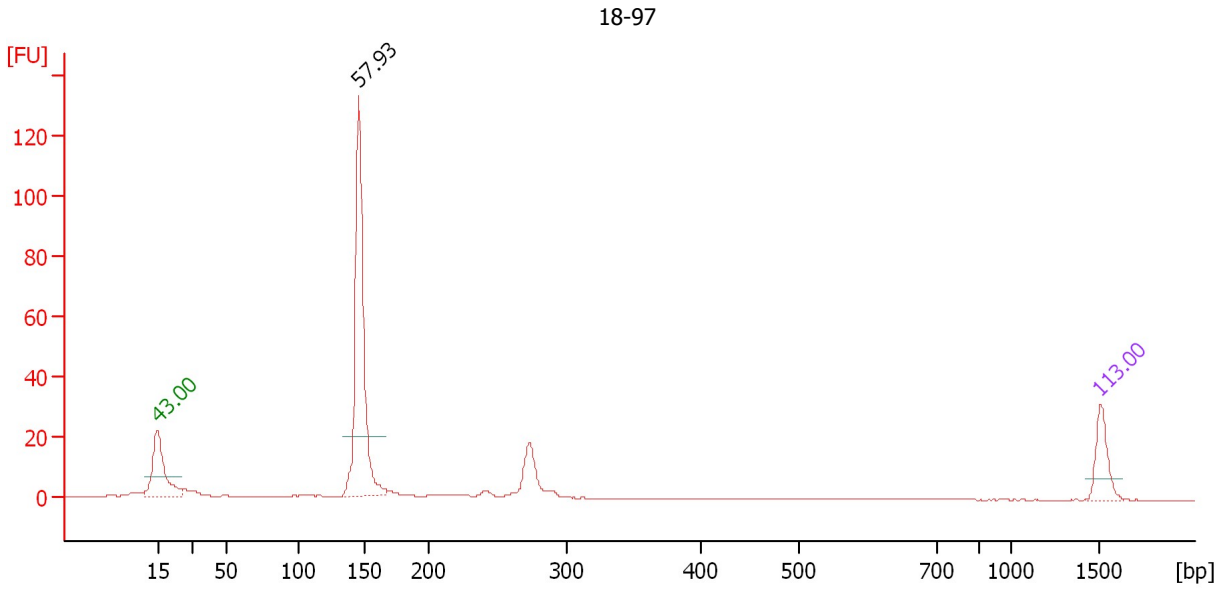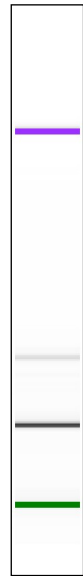

**Overall Results for sample 9 : 18-97**

Number of peaks found: 1

**Peak table for sample 9 : 18-97**

| Peak | Size [bp] | Conc. [ng/μl] | Molarity [nmol/l] | Observations |
|------|-----------|---------------|-------------------|--------------|
| 1    | 15        | 4.20          | 424.2             | Lower Marker |
| 2    | 146       | 13.69         | 142.3             |              |
| 3    | 1,500     | 2.10          | 2.1               | Upper Marker |

Assay Class: DNA 1000  
 Data Path: C:\...-16\2100 expert\_DNA 1000\_DE72901399\_2015-11-16\_09-53-21.xad

Created: 11/16/2015 9:53:20 AM  
 Modified: 2/2/2016 8:53:35 AM

**Electropherogram Summary Continued ...**

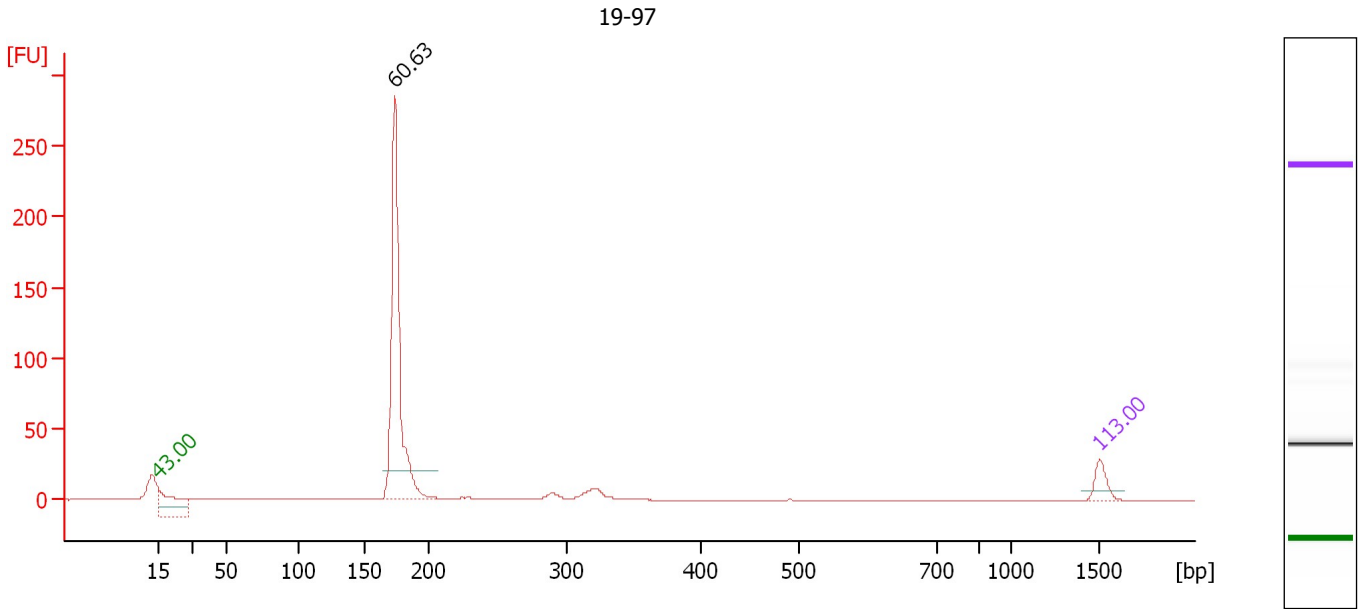

**Overall Results for sample 10 : 19-97**

Number of peaks found: 1

**Peak table for sample 10 : 19-97**

| Peak | Size [bp] | Conc. [ng/μl] | Molarity [nmol/l] | Observations |
|------|-----------|---------------|-------------------|--------------|
| 1    | 15        | 4.20          | 424.2             | Lower Marker |
| 2    | 173       | 28.60         | 249.8             |              |
| 3    | 1,500     | 2.10          | 2.1               | Upper Marker |

Assay Class: DNA 1000  
 Data Path: C:\...-16\2100 expert\_DNA 1000\_DE72901399\_2015-11-16\_09-53-21.xad

Created: 11/16/2015 9:53:20 AM  
 Modified: 2/2/2016 8:53:35 AM

**Electropherogram Summary Continued ...**

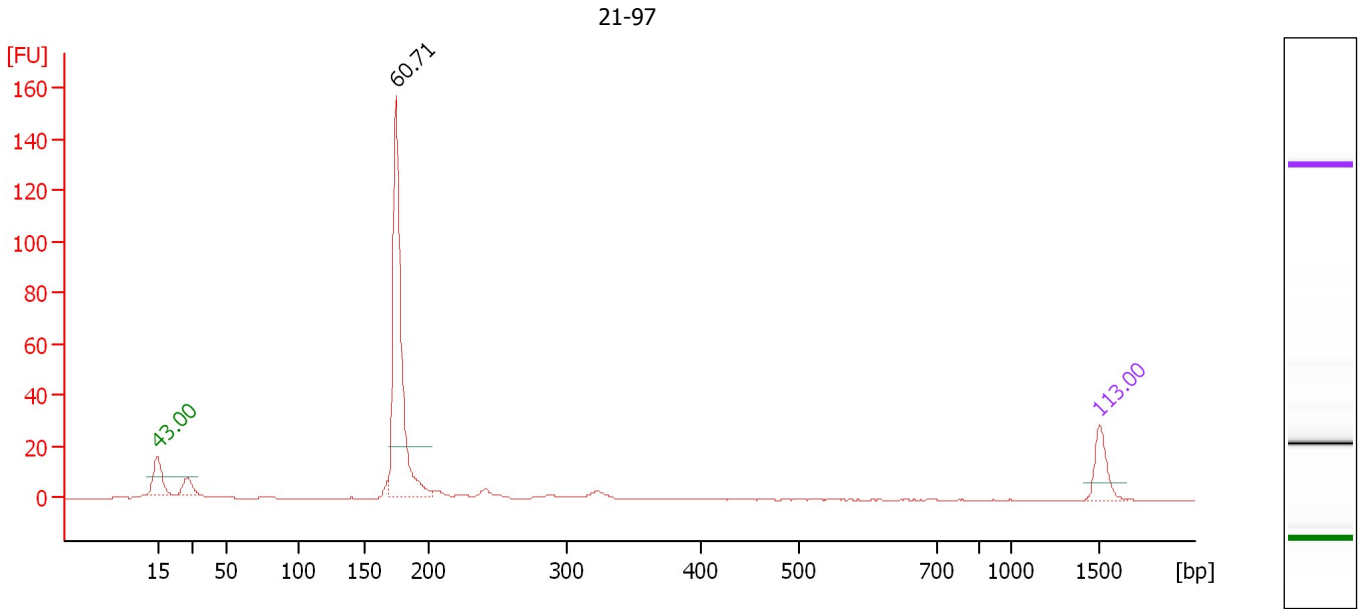

**Overall Results for sample 11 : 21-97**

Number of peaks found: 1

**Peak table for sample 11 : 21-97**

| Peak | Size [bp] | Conc. [ng/μl] | Molarity [nmol/l] | Observations |
|------|-----------|---------------|-------------------|--------------|
| 1    | 15        | 4.20          | 424.2             | Lower Marker |
| 2    | 174       | 16.34         | 142.1             |              |
| 3    | 1,500     | 2.10          | 2.1               | Upper Marker |

Assay Class: DNA 1000  
 Data Path: C:\...-16\2100 expert\_DNA 1000\_DE72901399\_2015-11-16\_09-53-21.xad

Created: 11/16/2015 9:53:20 AM  
 Modified: 2/2/2016 8:53:35 AM

**Electropherogram Summary Continued ...**

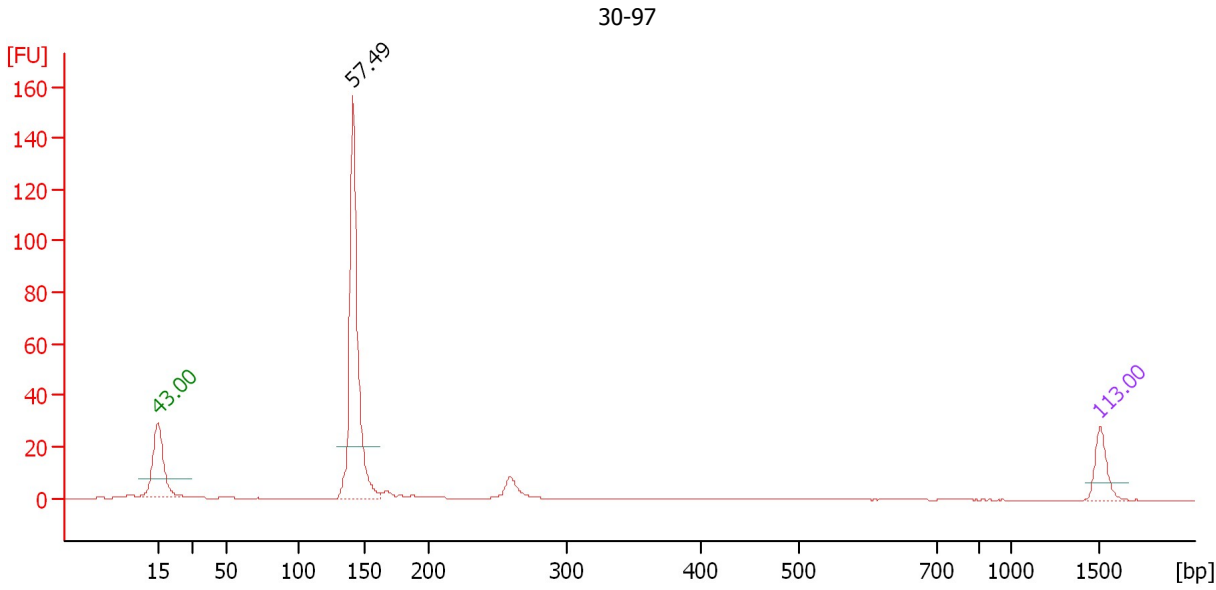

**Overall Results for sample 12 : 30-97**

Number of peaks found: 1

**Peak table for sample 12 : 30-97**

| Peak | Size [bp] | Conc. [ng/μl] | Molarity [nmol/l] | Observations |
|------|-----------|---------------|-------------------|--------------|
| 1    | 15        | 4.20          | 424.2             | Lower Marker |
| 2    | 141       | 17.75         | 190.4             |              |
| 3    | 1,500     | 2.10          | 2.1               | Upper Marker |



Assay Class: DNA 1000  
Data Path: C:\...-16\2100 expert\_DNA 1000\_DE72901399\_2015-11-16\_09-53-21.xad

Created: 11/16/2015 9:53:20 AM  
Modified: 2/2/2016 8:53:35 AM

Gel Image

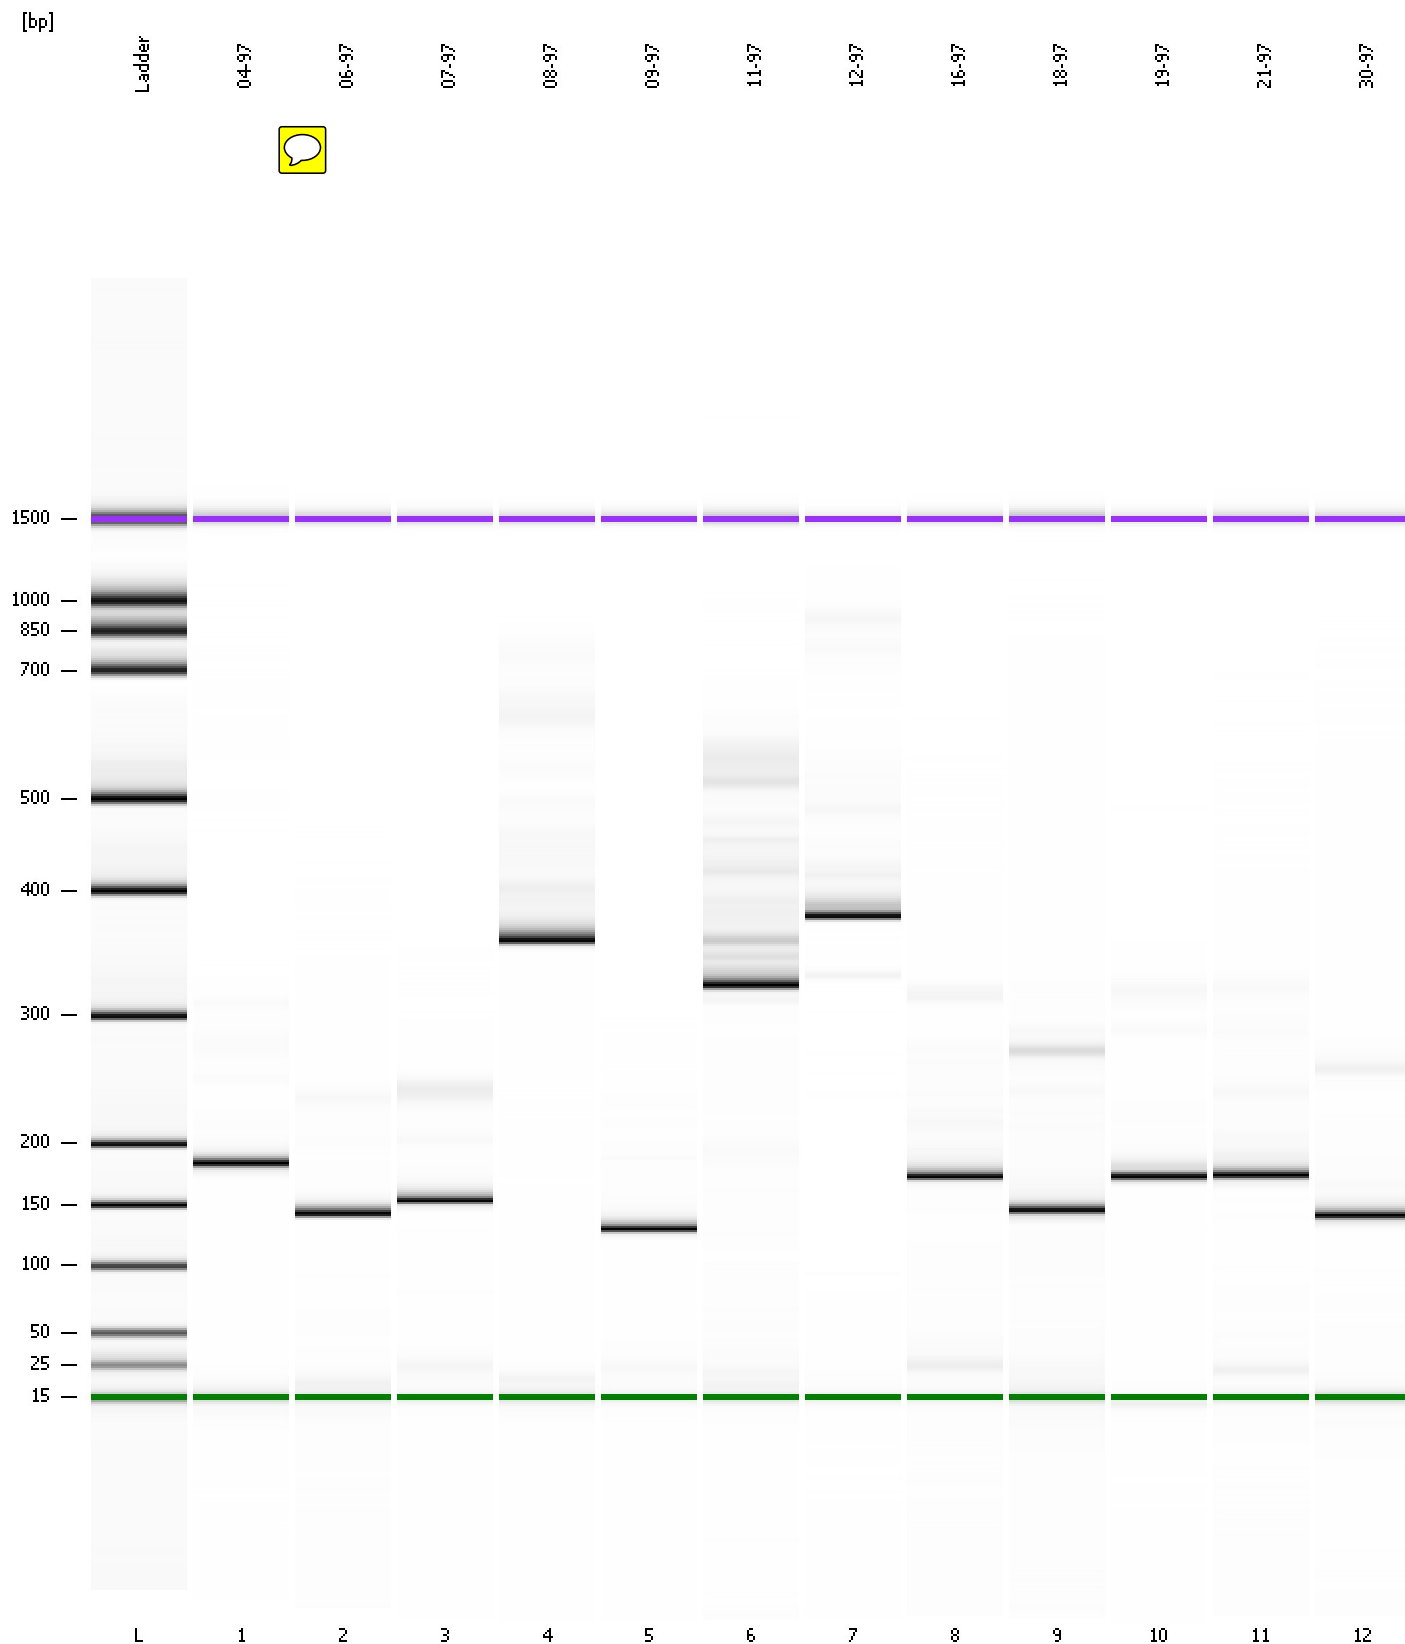

Assay Class: DNA 1000  
 Data Path: C:\...-16\2100 expert\_DNA 1000\_DE72901399\_2015-11-16\_09-53-21.xad

Created: 11/16/2015 9:53:20 AM  
 Modified: 2/2/2016 8:53:35 AM

**Run Logbook**

| Description                                                                                                                                                 | Number | Source     | Category | Sub Category | Time                   | Time Zone                            | User          | Host            |
|-------------------------------------------------------------------------------------------------------------------------------------------------------------|--------|------------|----------|--------------|------------------------|--------------------------------------|---------------|-----------------|
| Run ended on port 2 (Number of wells acquired: 13)                                                                                                          |        | Instrument | Run      |              | 11/16/2015 10:35:12 AM | (GMT +01:00) W. Europe Standard Time | Administrator | V-RCF-G1-AG2100 |
| Run started on port 2 (File: C:\Program Files\Agilent\2100 bioanalyzer\2100 expert\Data\2015-11-16\2100 expert_DNA 1000_DE72901399_2015-11-16_09-53-21.xad) |        | Instrument | Run      |              | 11/16/2015 9:53:27 AM  | (GMT +01:00) W. Europe Standard Time | Administrator | V-RCF-G1-AG2100 |
| Product Number : G2939A                                                                                                                                     |        | Instrument | Run      |              | 11/16/2015 9:53:27 AM  | (GMT +01:00) W. Europe Standard Time | Administrator | V-RCF-G1-AG2100 |
| Name :                                                                                                                                                      |        | Instrument | Run      |              | 11/16/2015 9:53:27 AM  | (GMT +01:00) W. Europe Standard Time | Administrator | V-RCF-G1-AG2100 |
| Vendor : Agilent Technologies                                                                                                                               |        | Instrument | Run      |              | 11/16/2015 9:53:27 AM  | (GMT +01:00) W. Europe Standard Time | Administrator | V-RCF-G1-AG2100 |
| Serial# : DE72901399                                                                                                                                        |        | Instrument | Run      |              | 11/16/2015 9:53:27 AM  | (GMT +01:00) W. Europe Standard Time | Administrator | V-RCF-G1-AG2100 |
| Firmware : C.01.069                                                                                                                                         |        | Instrument | Run      |              | 11/16/2015 9:53:27 AM  | (GMT +01:00) W. Europe Standard Time | Administrator | V-RCF-G1-AG2100 |
| Cartridge : Electrode                                                                                                                                       |        | Instrument | Run      |              | 11/16/2015 9:53:26 AM  | (GMT +01:00) W. Europe Standard Time | Administrator | V-RCF-G1-AG2100 |
